# Supplementary material for: Tumor Microenvironment in Sporadic Vestibular Schwannoma: A Systematic, Narrative Review
Source: MDPI journal article supplement (doi:10.3390/ijms24076522), 2023-03-30
Supplement: s1 [file s1]

## SEARCH QUERIES

### PUBMED

("neuroma, acoustic"[MeSH Terms] OR "vestibular schwannoma"[All Fields] OR "acoustic neuroma"[All Fields]) AND ("Cellular Microenvironment"[MeSH Terms] OR "Tumor Microenvironment"[MeSH Terms] OR "Immunohistochemistry"[MeSH Terms] OR "Intercellular Signaling Peptides and Proteins"[MeSH Terms] OR ("microenvironment"[All Fields] OR "microenvironment s"[All Fields] OR "microenvironments"[All Fields]) OR "immunohistochemical profile"[All Fields] OR ("immunohistochemistries"[All Fields] OR "Immunohistochemistry"[MeSH Terms] OR "Immunohistochemistry"[All Fields]) OR "growth factor"[All Fields]).

### SCOPUS

(( TITLE-ABS-KEY ( microenvironment ) OR TITLE-ABS-KEY ( "immunohistochemical profile" ) OR TITLE-ABS-KEY ( "Immunohistochemistry" ) OR TITLE-ABS-KEY ( "growth factor" ) ) ) AND ( ( TITLE-ABS-KEY ( "vestibular schwannoma" ) OR TITLE-ABS-KEY ( "acoustic neuroma" ) ) ) AND ( LIMIT-TO ( OA , "all" ) ) AND ( LIMIT-TO ( SUBJAREA , "MEDI" ) ).

### WEB OF SCIENCE

(( TITLE-ABS-KEY ( microenvironment ) OR TITLE-ABS-KEY ( "immunohistochemical profile" ) OR TITLE-ABS-KEY ( "Immunohistochemistry" ) OR TITLE-ABS-KEY ( "growth factor" ) ) ) AND ( ( TITLE-ABS-KEY ( "vestibular schwannoma" ) OR TITLE-ABS-KEY ( "acoustic neuroma" ) ) ) AND ( LIMIT-TO ( OA , "all" ) ) AND ( LIMIT-TO ( SUBJAREA , "MEDI" ) ).

|                      | Author                    | Year | Quality assessment |
|----------------------|---------------------------|------|--------------------|
| ANGIOGENESIS         | Brieger et al. [26]       | 2003 | Good               |
|                      | Cayè-Thomasen et al. [28] | 2005 | Fair               |
|                      | Koutsimpelas et al. [38]  | 2007 | Good               |
|                      | Koutsimpelas et al. [39]  | 2012 | Good               |
|                      | Marioni et al. [46]       | 2019 | Good               |
|                      | Matsunaga et al. [48]     | 1996 | Fair               |
|                      | Xia et al. [57]           | 2020 | Poor               |
| IMMUNO INFILTRATE    | Amit et al. [23]          | 2022 | Fair               |
|                      | De Vries et al. [29]      | 2012 | Good               |
|                      | De Vries et al. [30]      | 2019 | Good               |
|                      | Gonçalves et al. [34]     | 2021 | Fair               |
|                      | Labit-Bouvier et al. [41] | 2000 | Fair               |
|                      | Leisz et al. [43]         | 2022 | Good               |
|                      | Lewis et al. [44]         | 2021 | Fair               |
|                      | Perry et al. [53]         | 2020 | Fair               |
| MOLECULAR REGULATORS | Ahmad et al. [21]         | 2009 | Good               |
|                      | Breun et al. [24]         | 2018 | Fair               |
|                      | Jabbour et al. [35]       | 2016 | Fair               |
|                      | Lassaletta et al. [42]    | 2011 | Good               |
|                      | Martini et al. [47]       | 2017 | Fair               |
|                      | Mawrin et al. [49]        | 2002 | Fair               |
|                      | Neff et al. [52]          | 2006 | Poor               |
|                      | Seol et al. [55]          | 2005 | Poor               |
| GROWTH FACTORS       | Altuna et al. [22]        | 2011 | Good               |
|                      | Diensthuber et al. [31]   | 2004 | Good               |
|                      | Dilwali et al. [33]       | 2013 | Poor               |
|                      | Kramer et al. [40]        | 2010 | Poor               |
|                      | Löttrich et al. [45]      | 2007 | Poor               |
|                      | Taurone et al. [56]       | 2015 | Fair               |

|                                   |                     |      |      |
|-----------------------------------|---------------------|------|------|
| LOCAL<br>INFLAMMATION<br>PROTEINS | Breun et al. [25]   | 2020 | Fair |
|                                   | Møller et al. [50]  | 2010 | Good |
|                                   | Moon et al. [51]    | 2007 | Fair |
|                                   | Sagers et al. [54]  | 2019 | Poor |
| HORMONE<br>RECEPTORS              | Cafer et al. [27]   | 2008 | Fair |
|                                   | Dillard et al. [32] | 2001 | Poor |
|                                   | Jaiswal et al. [36] | 2016 | Fair |
|                                   | Klinken et al. [37] | 1990 | Poor |

**Table S1. Quality assessment of the included studies.**
